# Supplementary material for: Bioinspired Hydrogel Coating Based on Methacryloyl Gelatin Bioactivates Polypropylene Meshes for Abdominal Wall Repair
Source: Polymers (Basel). 2020 Jul 28;12(8):1677. doi: 10.3390/polym12081677 (PMC7464529; doi:10.3390/polym12081677)
Supplement: Supplementary file 1 [file polymers-12-01677-s001.pdf]

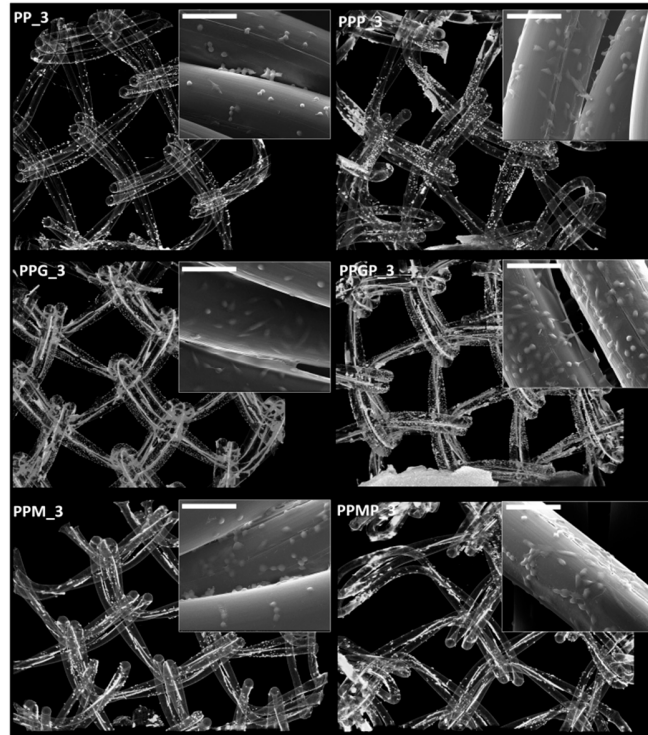

**Figure S1.** Micro-CT and SEM images at three days post-seeding; left column, top to bottom—PP\_3 and protein-coated PP (PPG\_3 and PPM\_3); right column, top to bottom: PRP-treated PP (PPP\_3) and PRP-treated hydrogel-coated sample PPGP\_3 and PPMP\_3; scalebar 100  $\mu$ m.
